# Supplementary material for: A rational approach towards selective ethylene oligomerization via PNP-ligand design with an N-triptycene functionality
Source: Royal Society of Chemistry journal article supplement (doi:10.1039/d2cc02456j), 2022-01-01
Supplement: d2cc02456j1.pdf [file d2cc02456j1.pdf]

## *Electronic Supplementary Information*

### **A rational approach towards selective ethylene oligomerization via PNP-ligand design with an *N*-tritycene functionality**

Samir Barman,<sup>\*[a]</sup> E. A. Jaseer,<sup>\*[a]</sup> Nestor Garcia,<sup>[a]</sup> Mohamed Elanany,<sup>[b]</sup> Motaz Khawaji,<sup>[b]</sup> Wei Xu,<sup>[b]</sup> Sibio Lin,<sup>[c]</sup> Hassan Alasiri,<sup>[a,d]</sup> Muhammad Naseem Akhtar<sup>[a]</sup> and Rajesh Theravalappil<sup>[a]</sup>

a. Center for Refining and Advanced Chemicals, King Fahd University of Petroleum and Minerals, Dhahran 31261, Saudi Arabia  
E-mail: samir.barman@kfupm.edu.sa, jaseer@kfupm.edu.sa

b. Saudi Aramco, Chemicals R&D, Research and Development Center, Dhahran 34464, Saudi Arabia.

c. Aramco Services Company: Aramco Research Center – Boston, 400 Technology Sq., Cambridge, MA 02139, United States.

d. Chemical Engineering Department, King Fahd University of Petroleum and Minerals, Dhahran 31261, Saudi Arabia

#### **Section S1    *General Comments***

All manipulations were performed under an inert atmosphere of dry argon using standard Schlenk techniques. Solvents, Ph<sub>2</sub>PCl, Et<sub>3</sub>N and other starting materials were purchased from Sigma Aldrich. MMAO-3A (7 wt% solution in heptane) was purchased from Nouryon. Cr(acac)<sub>3</sub> (97% purity) was purchased from Strem chemicals. The ethylene gas (99.995% purity) was procured from Abdulla Hashim Gas Co., Saudi Arabia. Solvents and amine were dried using the appropriate reagents (sodium metal, calcium hydride and molecular sieve) and distilled under an argon atmosphere prior to use. Nuclear magnetic resonance (NMR) spectra were obtained at RT with a Bruker 400 MHz instrument using SiMe<sub>4</sub> for <sup>1</sup>H and <sup>13</sup>C and 85% H<sub>3</sub>PO<sub>4</sub> for <sup>31</sup>P as external standards. Gas chromatography-mass spectrometric (GC-MS) data were obtained using a GC system 7890A armed with 5975C inert MSD with Triple-Axis Detector (Column: DB1,30 m x 320 μm x 1 μm). GC/FID analyses Agilent Technologies 7890A. Column: PoraBOND, 60 m x 320 μm x 0.5 μm.

#### **Section S2    *Computational details***

Energy of PNP-to-PPN isomerization ( $\Delta G_{\text{PPN}}$ ) was calculated using the same procedure as in our prior study.<sup>1</sup> For percent buried volume calculations, geometries of catalytic intermediate metallocycloheptanes (cationic charge and quartet spin state) were optimized using the PBE functional and the DNP basis as implemented in DMol3 (Materials Studio, Biovia). Then the ligand atoms were isolated by deleting the Cr and metallocycloheptane atoms. Then percent buried volume about the nitrogen center was calculated with SambVca 2.1 using the default parameters: atomic radii = 1.17 \* Bondi radii, evaluation radius around N = 3.5 Å, 0.10 mesh spacing or numerical integration, and ignoring hydrogen atoms.<sup>2</sup>

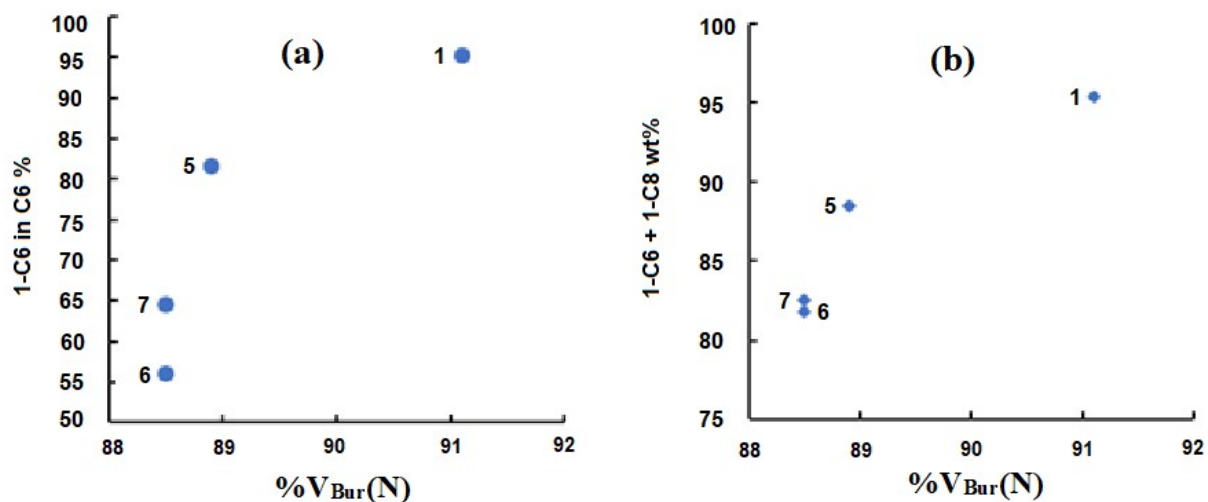

**Fig S1.** Correlations between %V<sub>Bur</sub>(N) of ligands **1**, **5-7** and catalytic outputs of Cr(acac)<sub>3</sub>/ligand/MMAO-3A: (a) 1-C<sub>6</sub> in total C<sub>6</sub> % and (b) 1-C<sub>6</sub> + 1-C<sub>8</sub> wt%. Reaction conditions: Cr(acac)<sub>3</sub> 1 μmol, PNP/Cr = 1, MMAO-3A 2 mmol, total solution volume 100 mL, 45 °C, 45 bar, 10 min.

### Section S3 *Synthesis and Characterization*

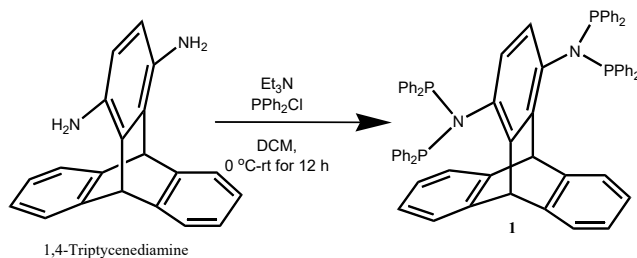

**Scheme S1.** Synthetic scheme for the preparation of ditopic PNP ligand **1**.

**Preparation of ditopic PNP ligand 1:** To a solution of 1,4-Triptycenediamine<sup>3,4</sup> (0.161 g, 0.567 mmol) and triethylamine (0.34 g, 3.4 mmol) in 8 mL dichloromethane, Ph<sub>2</sub>PCl (0.5 g, 2.26 mmol) dissolved in 2 mL dichloromethane was slowly added at 0 °C. The reaction mixture was stirred at this temperature for 1h then allowed to warm up to rt followed by additional stirring for 12 h. After this time, the solvent was removed under reduced pressure and the residue was extracted with anhydrous THF (3 × 5 mL). After removal of the THF solvent the remaining solid residue was triturated with dry CH<sub>3</sub>CN (3 × 4 mL) followed by vacuum drying at 40 °C for 6 h to yield ligand **1**. Yield: 0.27 g, 47%. <sup>1</sup>H NMR (CDCl<sub>3</sub>): δ 7.44–6.80 (m, aromatic H), 5.81 (s, 2H, aromatic), 5.55 (s, 2 tertiary H) ppm; <sup>13</sup>C NMR (CDCl<sub>3</sub>): 49.31, 123.81, 124.64, 125.88, 128.02, 128.43, 129.50, 132.51, 132.71, 133.77, 134.01, 139.52, 142.15, 143.76, 144.98 ppm; <sup>31</sup>P NMR

(CDCl<sub>3</sub>): δ 59.34 (s) ppm. Anal. Calc. for C<sub>68</sub>H<sub>52</sub>N<sub>2</sub>P<sub>4</sub>: H 5.13, C 79.99, N 2.74%. Found H 4.6, C 79.14, N 3.52%.

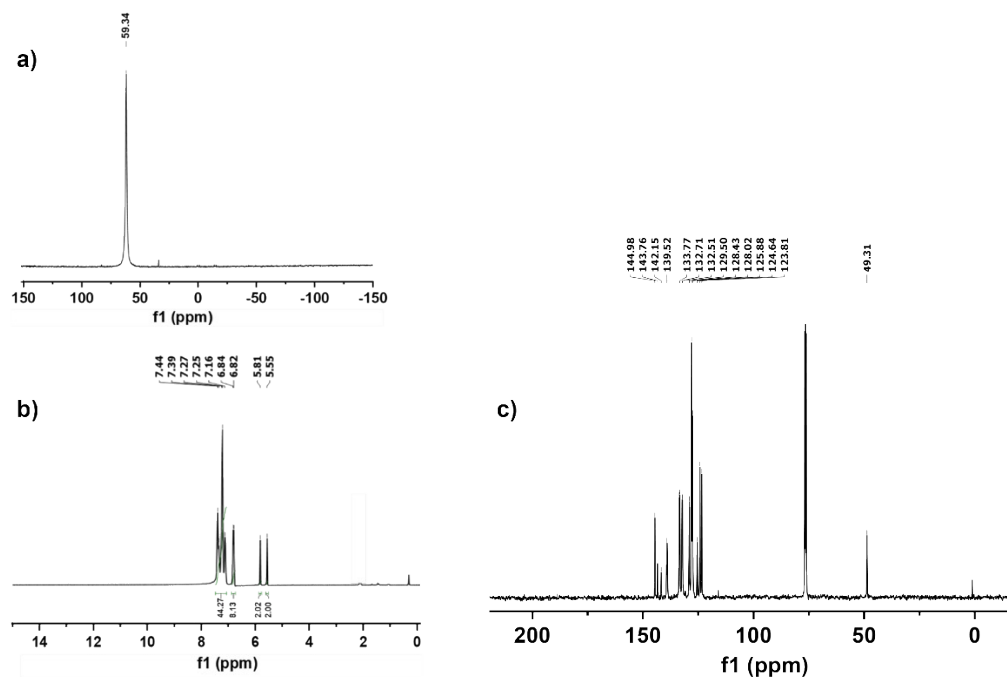

**Fig S2.** The liquid state <sup>31</sup>P (a) <sup>1</sup>H (b) and <sup>13</sup>C (c) NMR spectra of **1**.

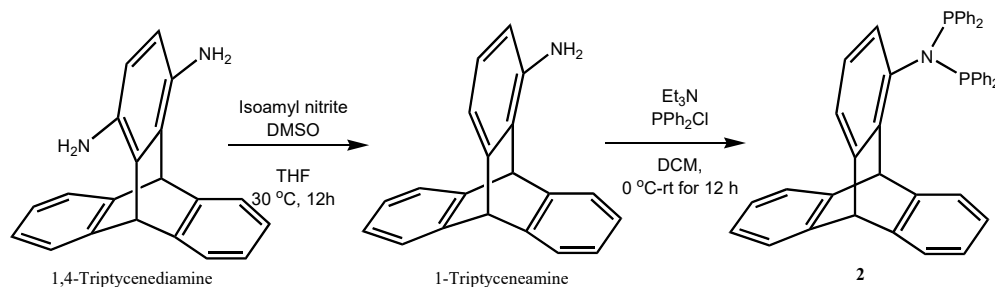

**Scheme S2.** Synthetic scheme for the preparation of 1-PNP substituted triptycene ligand **2**.

**Preparation of 1-Triptyceneamine.** To a solution of 1,4-Triptycenediamine (0.50 g, 1.75 mmol) in THF (2 mL) was added dropwise over 20 min a solution of isoamyl nitrite (2.63 mmol) and DMSO (0.175 mmol) in THF (2 mL) at 30 °C. The mixture was stirred for additional 12 h. The solvent was evaporated, and the residue was purified by column chromatography on silica gel (hexane/ethyl acetate) to yield the desired 1-Triptyceneamine precursor in 15% yield. <sup>1</sup>H NMR (CDCl<sub>3</sub>): δ 7.45 (m, 4H), 7.15 (m, 4H), 6.97 (d, 1H), 6.87 (t, 1H), 6.44 (d, 1H), 5.53 (s, 1H), 5.45 (s, 1H), 3.72 (br, 2H) ppm; <sup>13</sup>C NMR (CDCl<sub>3</sub>): 48.01, 54.52, 113.8, 115.09, 123.46, 123.69, 125.08, 125.22, 125.89, 129.97, 140.81, 144.93, 145.72, 146.64 ppm. Anal. Calc. for C<sub>20</sub>H<sub>15</sub>N: H 5.61, C 89.19, N 5.20%. Found H 5.46, C 89.33, N 5.02%.

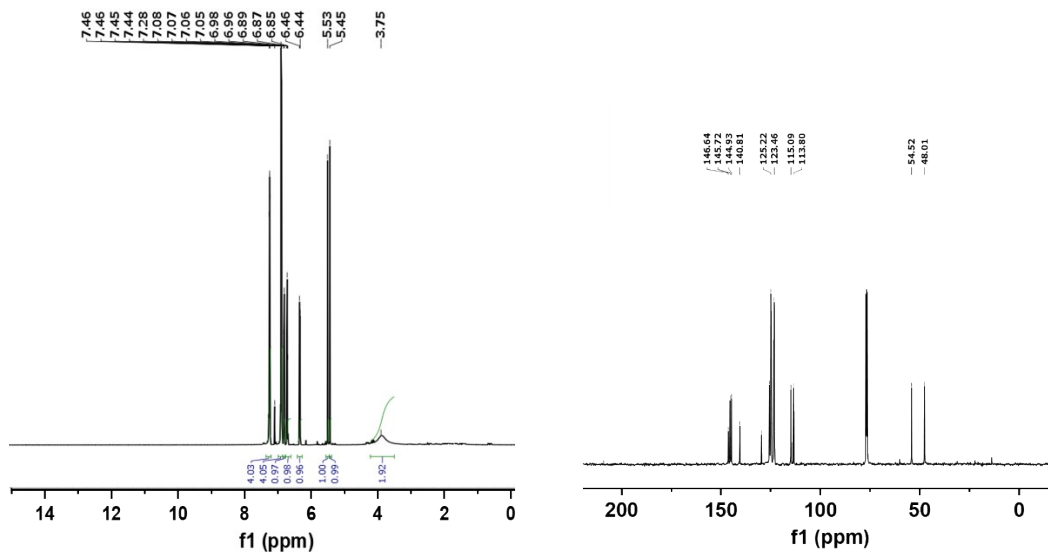

**Fig S3.** The liquid state  $^1\text{H}$  (left) and  $^{13}\text{C}$  (right) NMR spectra of 1-Triptyceneamine.

**Preparation of 2:** To a solution of 1-Triptyceneamine (0.07 g, 0.26 mmol) and triethylamine (0.079 g, 0.78 mmol) in 1.5 mL dichloromethane,  $\text{Ph}_2\text{PCl}$  (0.115 g, 0.52 mmol) was slowly added at 0 °C. The mixture was stirred for 1 h and allowed to warm up to r.t. followed by additional stirring for 14 h. The volatiles were removed under reduced pressure and the residue was extracted with anhydrous THF (2 × 2 mL). After removing THF the remaining solid was degassed under vacuum at 50 °C for 3 h to yield desired ligand **2** in 62% yield.  $^1\text{H}$  NMR ( $\text{CD}_2\text{Cl}_2$ ):  $\delta$  6.14-7.49 (aromatic, 31H) 5.75 (s, 1H, bridge), 5.43 (s, 1H, bridge) ppm;  $^{13}\text{C}$  NMR ( $\text{CD}_2\text{Cl}_2$ ): 48.02, 54.36, 115.48, 116.31, 123.12, 123.42, 123.55, 123.92, 125.83, 128.41, 128.66, 130.95, 131.15, 140.76, 144.59, 144.8, 145.45, 145.65, 146.62 ppm;  $^{31}\text{P}$  NMR ( $\text{CD}_2\text{Cl}_2$ ):  $\delta$  60.09 (s) ppm. Elemental microanalysis: Calculated (%) for  $\text{C}_{44}\text{H}_{33}\text{NP}_2$ : H 5.22, C 82.87, N 2.20; Found (%) H 5.11, C 82.43, N 2.09.

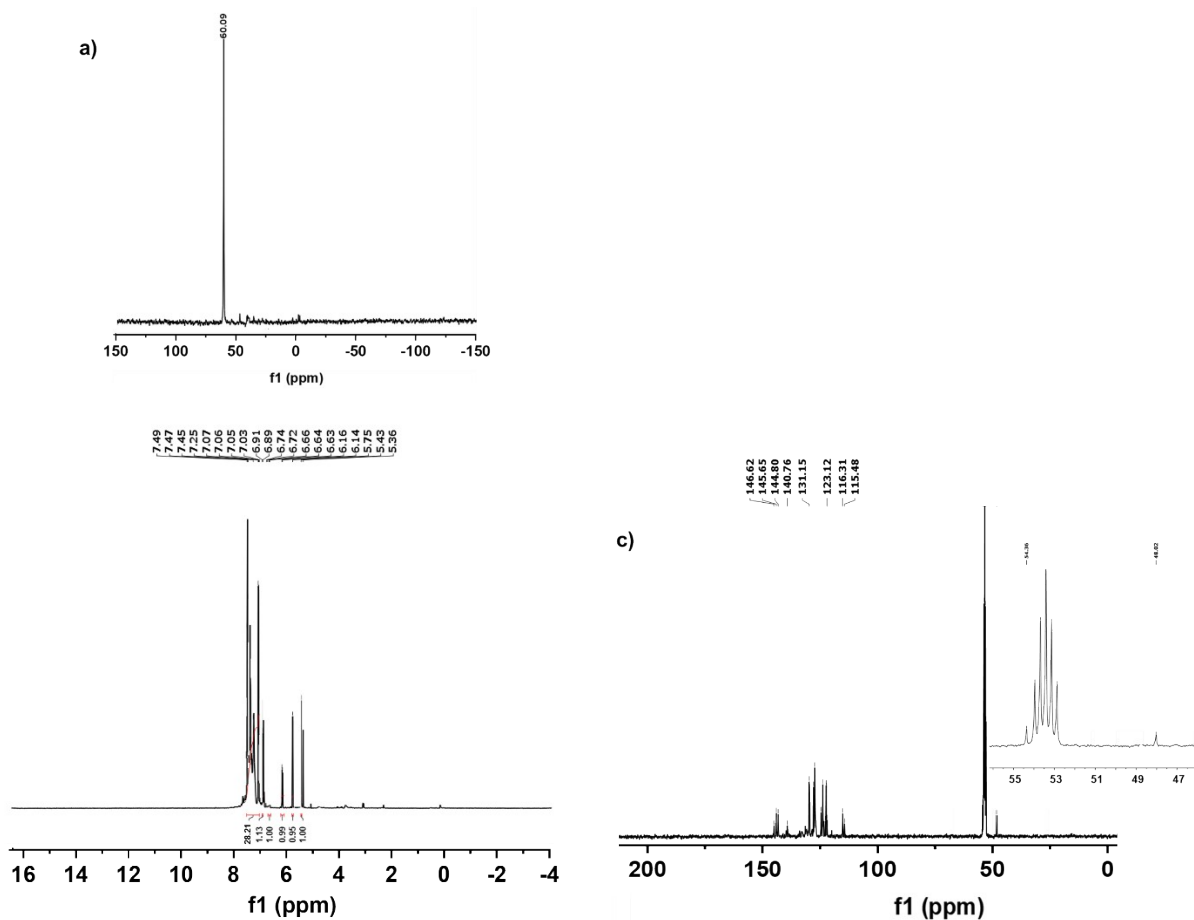

**Fig S4.** The liquid state  $^{31}\text{P}$  (a)  $^1\text{H}$  (b) and  $^{13}\text{C}$  (c) NMR spectra of **2**.

**Preparation of 3:** To a solution of 2,6-diaminotriptycene<sup>5</sup> (0.059 g, 0.21 mmol) and triethylamine (0.125 g, 1.24 mmol) in 2 mL dichloromethane,  $\text{Ph}_2\text{PCl}$  (0.18 g, 0.825 mmol) was slowly added at 0 °C. The mixture was stirred for 1 h and allowed to warm up to r.t. followed by additional stirring for 14 h. The volatiles were removed under reduced pressure and the residue was extracted with anhydrous THF (2 × 2 mL). After removing THF the remaining solid was triturated with anhydrous  $\text{CH}_3\text{CN}$  (1 × 3 mL) followed by degassing at 50 °C to yield desired ligand **3** as white solid in 63% yield.  $^1\text{H}$  NMR ( $\text{CD}_2\text{Cl}_2$ ):  $\delta$  6.30–7.31 (aromatic, 50H), 4.83 (bridge, 2H) ppm;  $^{13}\text{C}$  NMR ( $\text{CD}_2\text{Cl}_2$ ): Bridge carbon peak is merged with reference peak, 124.17, 127.15, 127.94, 128.20, 128.75, 129, 129.82, 132.33, 133.12, 133.23, 133.97, 139.35, 140.20, 142.13, 143.91, 144.85, 145.13;  $^{31}\text{P}$  NMR ( $\text{CD}_2\text{Cl}_2$ ):  $\delta$  65.95 (s) ppm. Anal. Calc. for  $\text{C}_{68}\text{H}_{52}\text{N}_2\text{P}_4$ : H 5.13, C 79.99, N 2.74%. Found H 4.93, C 79.08, N 2.52%.

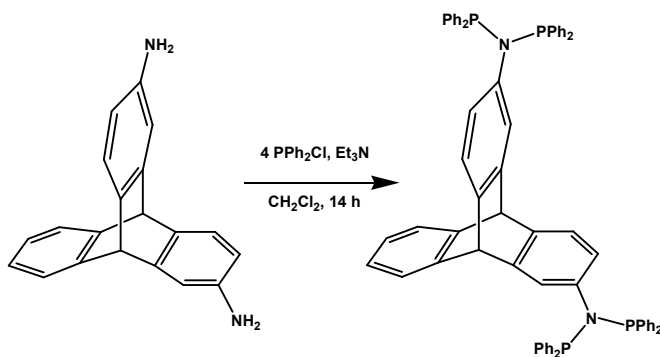

**Scheme S3.** Synthetic scheme for the preparation of ligand **3**.

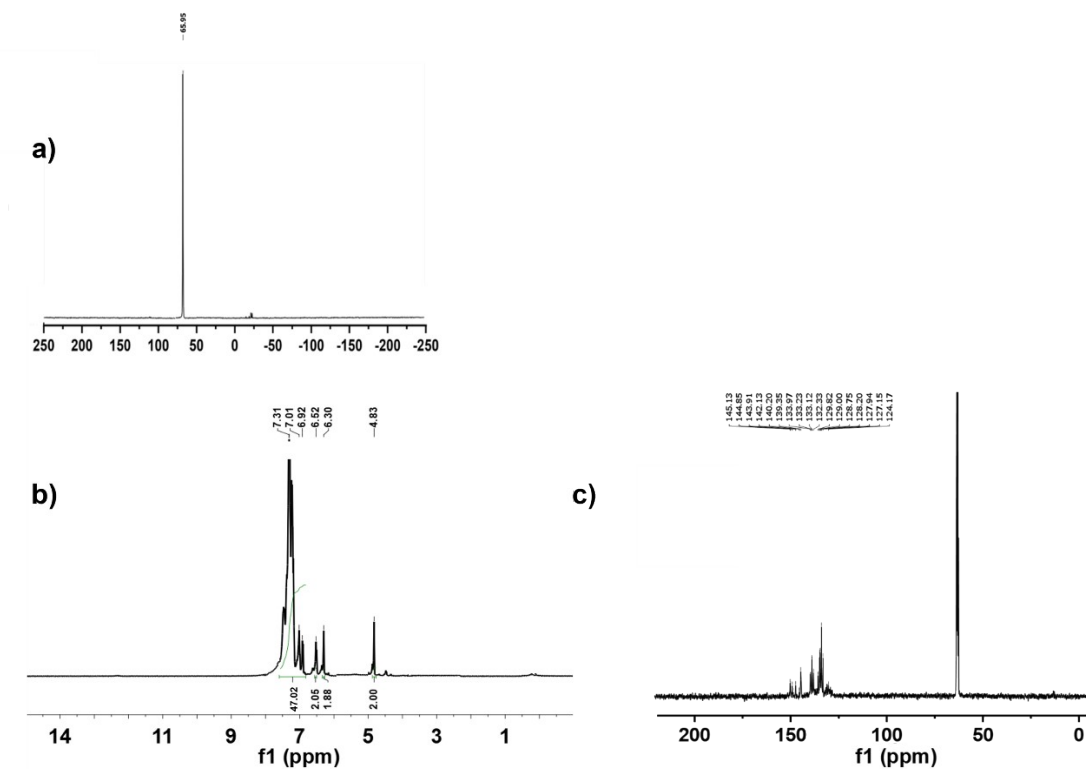

**Fig S5.** The liquid state  $^{31}\text{P}$  (a)  $^1\text{H}$  (b) and  $^{13}\text{C}$  (c) NMR spectra of **3**.

**Preparation of 4:** To a solution of 2-aminotriptycene<sup>6</sup> (0.11 g, 0.41 mmol) and triethylamine (0.125 g, 1.24 mmol) in 3 mL dichloromethane,  $\text{Ph}_2\text{P-Cl}$  (0.18 g, 0.825 mmol) was slowly added at  $0^\circ\text{C}$ . The mixture was stirred for 1 h and allowed to warm up to r.t. followed by additional stirring for 14 h. The volatiles were removed under reduced pressure and the residue was extracted with anhydrous THF ( $2 \times 2 \text{ mL}$ ). After removing THF the remaining solid was triturated with cold hexane ( $2 \times 2 \text{ mL}$ ) followed by degassing at  $50^\circ\text{C}$  to yield desired ligand **4** as white solid in 63% yield.  $^1\text{H}$  NMR ( $\text{CD}_2\text{Cl}_2$ ):  $\delta$  6.37-7.50 (aromatic, 31H), 5.33 (s, 1H, bridge), 4.98 (s, 1H, bridge) ppm;  $^{13}\text{C}$  NMR ( $\text{CD}_2\text{Cl}_2$ ): 106.97, 111.82, 112.14, 123.55, 124.95, 125.14, 127.92, 128.48, 128.99, 130.91, 131.12, 131.50, 133.18, 135.12, 135.37, 139.30, 144.23, 145.19, 145.86 ppm;  $^{31}\text{P}$  NMR ( $\text{CD}_2\text{Cl}_2$ ):  $\delta$  65.71 (s) ppm. Elemental microanalysis: Calculated (%) for  $\text{C}_{44}\text{H}_{33}\text{NP}_2$ : H 5.22, C 82.87, N 2.2; Found (%) H 4.89, C 82.13, N 2.33.

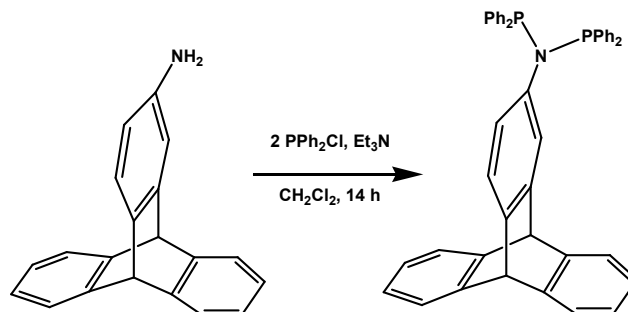

**Scheme S4.** Synthetic scheme for the preparation of ligand **4**.

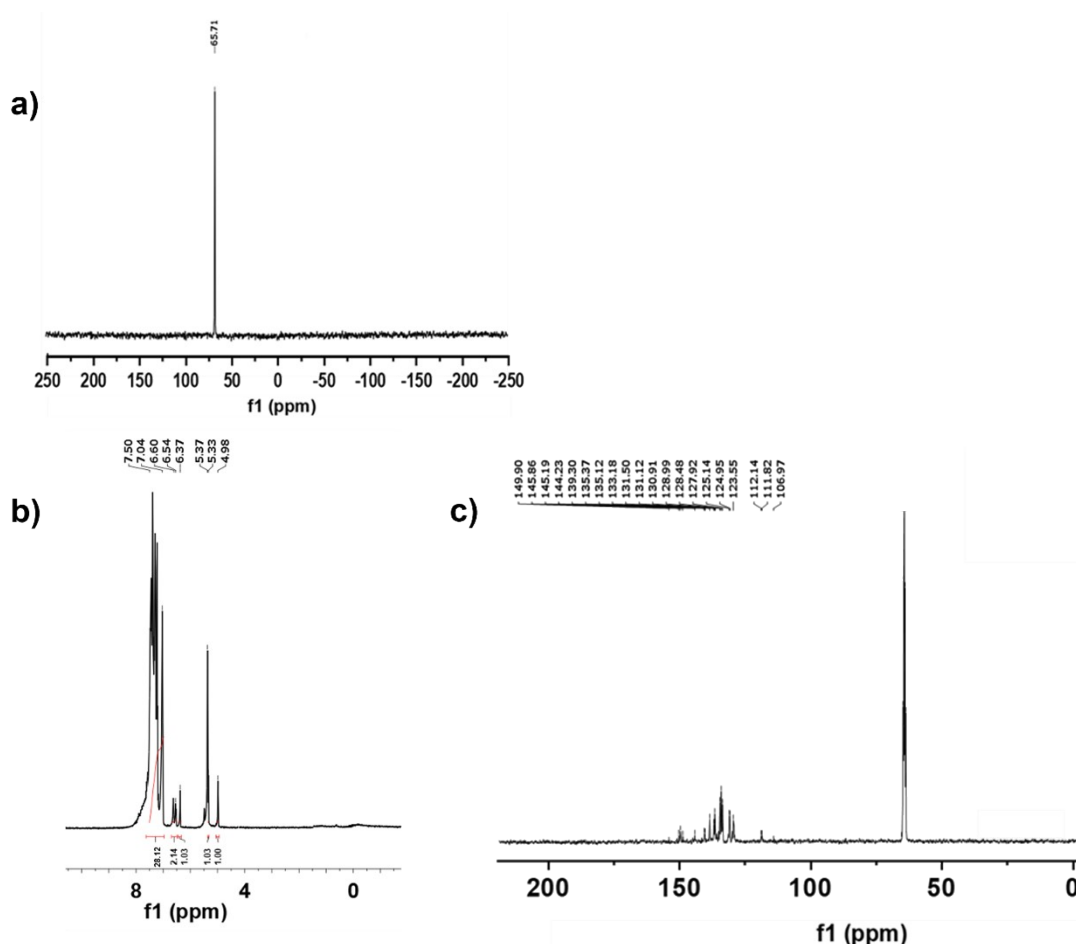

**Fig S6.** The liquid state  $^{31}\text{P}$  (top)  $^1\text{H}$  (bottom left) and  $^{13}\text{C}$  (bottom right) NMR spectra of **4**.

**Preparation of 8:** To a solution of 2,3-dimethylbenzenamine (0.10 g, 0.82 mmol) and triethylamine (2.47 mmol) in 3 mL dichloromethane,  $\text{Ph}_2\text{P-Cl}$  (1.65 mmol) was slowly added at 0 °C. The mixture was stirred for 1 h and allowed to warm up to r.t. followed by additional stirring for 14 h. The volatiles were removed under reduced pressure and the residue was extracted with anhydrous THF (2 × 2 mL). After removing THF the remaining solid was triturated with cold  $\text{CH}_3\text{CN}$  (3 × 2 mL) followed by degassing at 50 °C to yield desired ligand **8** as white solid in 43%

yield.  $^1\text{H}$  NMR ( $\text{CD}_2\text{Cl}_2$ ):  $\delta$  6.55-7.51 (aromatic, 23H), 2.15 (s, 3H,  $-\text{CH}_3$ ), 1.53 (s, 3H,  $-\text{CH}_3$ ) ppm;  $^{13}\text{C}$  NMR ( $\text{CD}_2\text{Cl}_2$ ): 14.89, 20.53, 125.06, 127.75, 128.26, 128.51, 129.98, 130.93, 132.40, 132.62, 134.61, 134.88, 136.19, 137.94, 139.12, 139.26, 139.83, 139.91, 146.85 ppm;  $^{31}\text{P}$  NMR ( $\text{CD}_2\text{Cl}_2$ ):  $\delta$  59.67 (s) ppm. Elemental microanalysis: Calculated (%) for  $\text{C}_{32}\text{H}_{29}\text{NP}_2$ : H 5.97, C 78.51, N 2.86; Found (%) H 5.81, C 78.13, N 2.39.

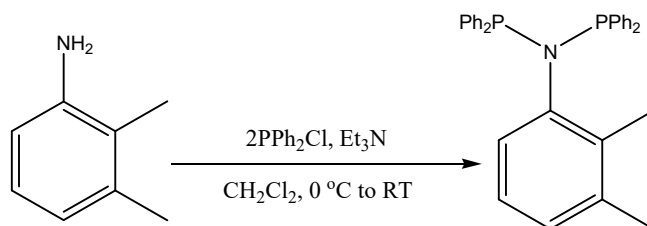

**Scheme S5.** Synthetic scheme for the preparation of ligand **8**.

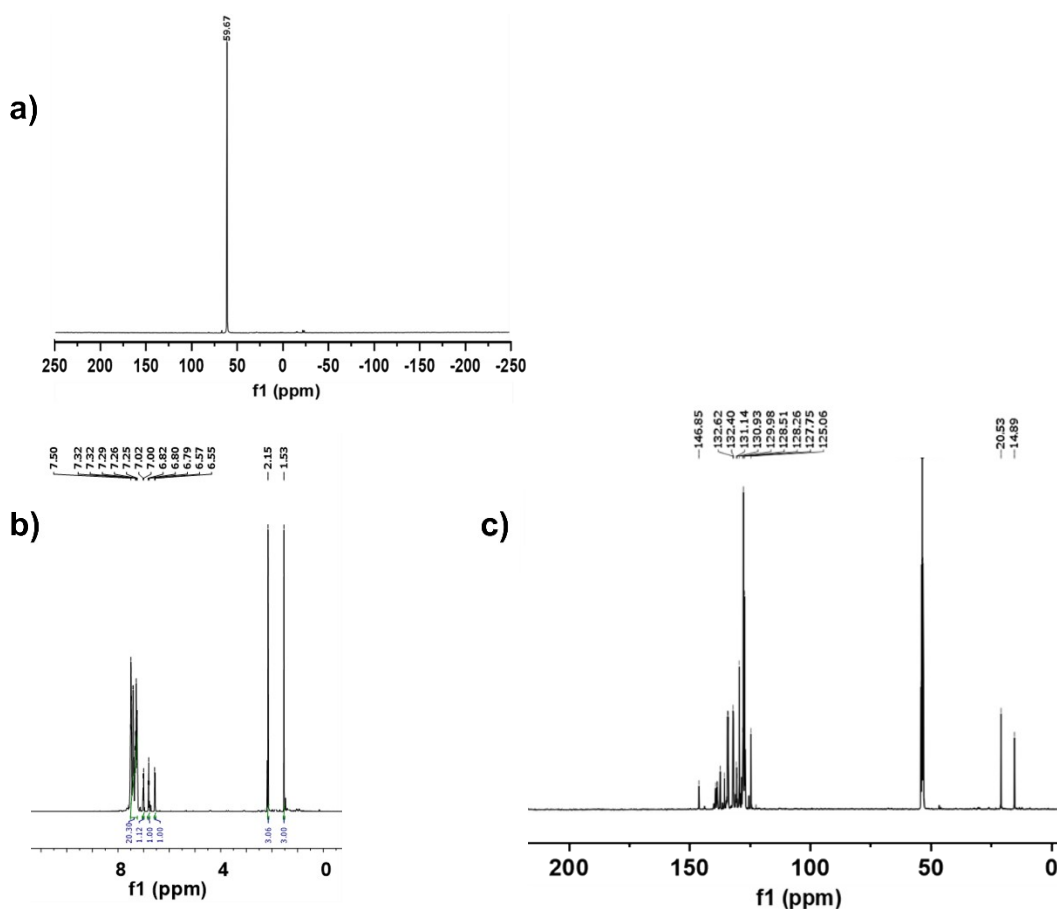

**Fig S7.** The liquid state  $^{31}\text{P}$  (a)  $^1\text{H}$  (b) and  $^{13}\text{C}$  (c) NMR spectra of **8**.



#### **Section S4    *General Oligomerization Procedure***

All runs for ethylene oligomerization were carried out in a 250 mL stainless steel (vessel) Buchi reactor system equipped with a propeller-like stirrer (1000 rpm) and injection barrel. Co-catalyst diluted in 95 mL of desired solvent and pre-catalyst mixture (containing Cr(acac)<sub>3</sub> and ligand dissolved in 5 mL of chlorobenzene or toluene) was charged to the reactor and pressurized with ethylene at 45 bar at the required temperature. The reaction temperature was maintained constant during the reaction by circulating hot oil in the jacket and by allowing the cool liquid to flow from the chiller through the cooling coil present inside the reactor vessel. The SCADA software controlled the reaction temperature and pressure of the reactor precisely using an electronic controller. Ethylene was fed on demand to keep the reactor pressure constant, and the uptake was monitored using a mass flow controller (MFC). After the desired reaction time, 2 mL methanol was injected to quench the reaction which was then cooled and depressurized slowly to atmospheric pressure. The small portion of the crude products was filtered and analyzed by GC-FID using nonane as internal standard. The remaining mixture was added to 50 mL of acidic methanol (5% HCl) and the polymeric products were recovered by filtration and washed with distilled water (3 × 50 mL) followed by drying at 60 °C under vacuum.

## Section S5 Cartesian coordinates (.xyz) of optimized molecules

126

### Ligand 1 (PNP-PNP isomer)

C -1.51097191 -3.01946919  
0.60646490  
C -2.32400274 -4.00692208  
0.05937560  
C -1.72964735 -5.15316734 -  
0.49290376  
C -0.34058579 -5.30338428 -  
0.48926134  
C 0.47809189 -4.31414721  
0.07970775  
C -0.11272643 -3.18184052  
0.62999395  
C 0.60554772 -2.00479508  
1.29004501  
C -0.01985859 -1.86728964  
2.67516052  
C 0.63661185 -1.95994880  
3.89790270  
C -0.10412144 -1.84923275  
5.08562611  
C -1.48630084 -1.65357711  
5.03830015  
C -2.14849141 -1.57217791  
3.80416449  
C -1.41342623 -1.67949364  
2.62932902  
C -1.96561672 -1.68538065  
1.20969864  
C -1.21544876 -0.61566746  
0.41608313  
C -1.78228891 0.39340113 -  
0.37125051  
C -0.91600131 1.19048890 -  
1.14287180  
C 0.45665745 1.01028618 -  
1.10698109  
C 1.04131353 0.04131239 -  
0.26894450  
C 0.18444356 -0.78439485  
0.46906458  
N 2.46747189 -0.15797123 -  
0.26526200  
P 2.96297159 -1.41841958 -  
1.39350198  
C 3.70398426 -0.40522760 -  
2.76096390  
C 2.79047030 0.04044809 -  
3.73399603  
C 3.19303502 0.92245653 -  
4.74038398  
C 4.52224718 1.35402430 -  
4.80041091  
C 5.44294293 0.90325108 -  
3.84759091  
C 5.03683458 0.03465457 -  
2.82977481  
H 5.75639989 -0.28946726 -  
2.07584969  
H 6.48216558 1.24018079 -  
3.88916120  
H 4.84194354 2.03961120 -  
5.58961268  
H 2.46690417 1.26942464 -  
5.48031943

H 1.74947890 -0.29158047 -  
3.68990011  
C 4.42668702 -2.17587690 -  
0.57011106  
C 4.58716226 -2.16915958  
0.82694925  
C 5.63148958 -2.87790885  
1.42811054  
C 6.52984652 -3.61022225  
0.64728024  
C 6.37372731 -3.63376057 -  
0.74296471  
C 5.32941171 -2.92863465 -  
1.34534727  
H 5.22131879 -2.95772555 -  
2.43343398  
H 7.06975373 -4.20449320 -  
1.36348118  
H 7.34769627 -4.16132989  
1.11838538  
H 5.74362596 -2.85001518  
2.51513792  
H 3.90231168 -1.59747231  
1.45493210  
P 3.65755964 1.05075884  
0.25340307  
C 2.86105088 2.65034006 -  
0.22866511  
C 1.90324839 3.33026923  
0.54229966  
C 1.22838857 4.43713602  
0.02238237  
C 1.51172587 4.88859684 -  
1.27048708  
C 2.49330898 4.24472223 -  
2.03204615  
C 3.16906204 3.13710150 -  
1.51246354  
H 3.91145947 2.61906431 -  
2.12545949  
H 2.72723445 4.59721871 -  
3.04004366  
H 0.96174122 5.73851304 -  
1.68212314  
H 0.45543065 4.93159930  
0.61481290  
H 1.65426102 2.97389784  
1.54346569  
C 3.50806691 1.11168435  
2.09474599  
C 4.67097274 1.51846096  
2.77512995  
C 4.69003176 1.62019031  
4.16824218  
C 3.54762054 1.29664752  
4.90753978  
C 2.39149637 0.87495330  
4.24462626  
C 2.36862265 0.78620616  
2.84847871  
H 1.45186921 0.46741531  
2.35377868  
H 1.49794694 0.60303053  
4.81019182  
H 3.56075613 1.36583669  
5.99841637  
H 5.60211856 1.94179697  
4.67798567

H 5.57410220 1.75227095  
2.20306281  
H 1.08970587 1.61304457 -  
1.75255053  
H -1.33669524 1.94551589 -  
1.80179020  
N -3.19547208 0.62969060 -  
0.43348988  
P -3.93664402 1.94838455  
0.46880455  
C -3.18324561 3.49063475 -  
0.25741440  
C -2.72304558 4.56153891  
0.52793766  
C -2.26909011 5.74442790 -  
0.06671595  
C -2.26763466 5.88086450 -  
1.45689642  
C -2.74641802 4.83178064 -  
2.25016217  
C -3.21072012 3.65770592 -  
1.65535504  
H -3.59227998 2.85345410 -  
2.28956359  
H -2.76177010 4.93002637 -  
3.33889763  
H -1.90571689 6.80214651 -  
1.92070384  
H -1.90845646 6.56137908  
0.56439677  
H -2.70765936 4.47619119  
1.61621713  
C -3.06734060 1.86040596  
2.10031757  
C -3.86453719 1.61655522  
3.23139461  
C -3.30134218 1.57778374  
4.51148856  
C -1.92944104 1.77876530  
4.67498053  
C -1.12314295 2.02234307  
3.55781005  
C -1.68475495 2.06445321  
2.28137768  
H -1.04496567 2.27230238  
1.42241035  
H -0.04979847 2.17918838  
3.68044064  
H -1.48382340 1.74015723  
5.67193736  
H -3.93637891 1.38680700  
5.38043871  
H -4.94098502 1.46620272  
3.10710435  
P -4.20092886 0.00821316 -  
1.75818181  
C -4.83272370 -1.61828020 -  
1.13885399  
C -5.34720148 -1.70196176  
0.16784855  
C -5.98809828 -2.86092954  
0.61213881  
C -6.14570073 -3.95232102 -  
0.24944539  
C -5.66025788 -3.87197266 -  
1.55837938  
C -5.01115537 -2.71498497 -  
2.00038057

H -4.62983420 -2.67345539 -  
 3.02341971  
 H -5.77778297 -4.71915602 -  
 2.23922801  
 H -6.64554949 -4.85990354  
 0.09793143  
 H -6.36790592 -2.91176732  
 1.63593429  
 H -5.24554830 -0.84924458  
 0.84413627  
 C -2.89733413 -0.49359814 -  
 2.96896334  
 C -2.71698147 0.32728267 -  
 4.09428124  
 C -1.66360373 0.09595740 -  
 4.98542107  
 C -0.77843942 -0.96224637 -  
 4.75945214  
 C -0.95438327 -1.79462358 -  
 3.64736020  
 C -2.00983560 -1.56591890 -  
 2.76337583  
 H -2.12626587 -2.21674997 -  
 1.89693920  
 H -0.25906583 -2.61476833 -  
 3.45318649  
 H 0.04948917 -1.14075652 -  
 5.45083985  
 H -1.53452984 0.74392075 -  
 5.85630805  
 H -3.40283076 1.16117242 -  
 4.27025352  
 H -3.04746583 -1.54960257  
 1.17208309  
 H -3.22875011 -1.41789532  
 3.76246769  
 H -2.05704720 -1.56328935  
 5.96606481  
 H 0.40561882 -1.91960346  
 6.05019172  
 H 1.71810134 -2.11062406  
 3.93093698  
 H 1.69065779 -2.13531355  
 1.32711166  
 H 1.56550272 -4.42436033  
 0.08593628  
 H 0.11351491 -6.19588079 -  
 0.92766893  
 H -2.36273531 -5.92858743 -  
 0.93193823  
 H -3.40677118 -3.88628390  
 0.04928017  
 126  
**Ligand 1 (PNP-PPN isomer)**  
 C -2.09499228 -3.10712480 -  
 0.52640772  
 C -3.11974268 -3.70867818 -  
 1.24976927  
 C -2.80018673 -4.67196893 -  
 2.22036761  
 C -1.46967164 -5.02887935 -  
 2.45151135  
 C -0.43784973 -4.43555706 -  
 1.70512480  
 C -0.75446810 -3.48094959 -  
 0.74384289  
 C 0.22222091 -2.72849720  
 0.15717029  
 C -0.25263550 -2.97833911  
 1.58359567  
 C 0.47547303 -3.55681389  
 2.61771934  
 C -0.12944272 -3.72833475  
 3.87423221  
 C -1.45169501 -3.32826662  
 4.07823202  
 C -2.18848401 -2.75389405  
 3.03040256  
 C -1.58719883 -2.57775689  
 1.79004024  
 C -2.24012738 -2.01042983  
 0.53206746  
 C -1.35665040 -0.85598352  
 0.05036797  
 C -1.76192296 0.45410427 -  
 0.23769666  
 C -0.77667474 1.34998438 -  
 0.69721593  
 C 0.54802198 0.96708561 -  
 0.85288892  
 C 0.97736269 -0.35372619 -  
 0.56363457  
 C -0.02152978 -1.24801592 -  
 0.12769618  
 N 2.26681770 -0.82786095 -  
 0.68690347  
 P 3.66313460 -0.10620229 -  
 0.88053773  
 C 3.87141940 0.75288400 -  
 2.49109756  
 C 2.85462085 0.57372046 -  
 3.44293577  
 C 2.92629157 1.23055215 -  
 4.67420513  
 C 4.01240838 2.06077548 -  
 4.96693806  
 C 5.02944221 2.24053069 -  
 4.02255670  
 C 4.95801884 1.59501313 -  
 2.78537528  
 H 5.74051640 1.76520735 -  
 2.04173891  
 H 5.87716813 2.89306806 -  
 4.24622178  
 H 4.06520335 2.57414675 -  
 5.93042799  
 H 2.12381179 1.09658534 -  
 5.40334668  
 H 2.00175475 -0.06701105 -  
 3.20901561  
 C 4.93316192 -1.41004522 -  
 0.73217843  
 C 4.67341727 -2.46819284  
 0.15539365  
 C 5.63846668 -3.45399271  
 0.36801378  
 C 6.86460720 -3.39519285 -  
 0.30305434  
 C 7.12376777 -2.34630400 -  
 1.19020444  
 C 6.16347656 -1.35284538 -  
 1.40324372  
 H 6.37570751 -0.54570878 -  
 2.10621064  
 H 8.07662596 -2.30078354 -  
 1.72350094  
 H 7.61832123 -4.16909329 -  
 0.13622118  
 H 5.43122235 -4.27166419  
 1.06283588  
 H 3.71431180 -2.50479510  
 0.67390972  
 P 4.44862943 1.40114603  
 0.67376694  
 C 4.13494284 0.31277159  
 2.13121224  
 C 2.88440064 -0.24818537  
 2.46069284  
 C 2.76202371 -1.10645610  
 3.55588934  
 C 3.88477247 -1.43402492  
 4.32444637  
 C 5.13277675 -0.89616098  
 3.99860998  
 C 5.25490346 -0.02616984  
 2.91107349  
 H 6.23322471 0.39110887  
 2.65777850  
 H 6.01466632 -1.15102674  
 4.59191698  
 H 3.78451168 -2.11188591  
 5.17634528  
 H 1.78540349 -1.53071275  
 3.79529393  
 H 2.00077565 -0.02945901  
 1.86085413  
 C 3.08494840 2.64832720  
 0.66869440  
 C 3.00719271 3.50269135 -  
 0.44937990  
 C 1.99466073 4.45859457 -  
 0.54717041  
 C 1.06041999 4.60261206  
 0.48267791  
 C 1.16497366 3.80046309  
 1.62201236  
 C 2.16836522 2.83381273  
 1.71822393  
 H 2.22305981 2.21528922  
 2.61428347  
 H 0.44306729 3.91731046  
 2.43299499  
 H 0.25441489 5.33290575  
 0.40571477  
 H 1.93460895 5.09185682 -  
 1.43612270  
 H 3.72626464 3.40546374 -  
 1.26527743  
 H 1.26922914 1.70338789 -  
 1.20386535  
 H -1.06387286 2.37377411 -  
 0.93308555  
 N -3.12150910 0.89117510 -  
 0.09513279  
 P -3.67757710 1.81085849  
 1.29117201  
 C -2.68570157 1.11521402  
 2.68966367  
 C -1.27963623 1.16033354  
 2.76556331  
 C -0.61419174 0.64452702  
 3.87848024  
 C -1.33865615 0.08846164  
 4.93890589  
 C -2.73304944 0.05024033  
 4.88275690  
 C -3.40056480 0.55590315  
 3.76176549  
 H -4.49328417 0.52430524  
 3.72031551

H -3.30465929 -0.38208001  
5.70812869  
H -0.81260091 -0.31941607  
5.80552674  
H 0.47699657 0.67500779  
3.91787945  
H -0.70160238 1.60555375  
1.95555512  
C -2.90806515 3.49657303  
1.11823625  
C -2.51975578 4.23641756  
2.24982593  
C -2.15530536 5.58203764  
2.13760728  
C -2.17473040 6.21656155  
0.89176731  
C -2.55364336 5.49042937 -  
0.24275252  
C -2.92048489 4.14761281 -  
0.12902213  
H -3.23197205 3.60145480 -  
1.02210592  
H -2.56822516 5.97386514 -  
1.22332497  
H -1.89257435 7.26894176  
0.80474520  
H -1.85328895 6.13679770  
3.03011188  
H -2.50187567 3.75908321  
3.23274734  
P -4.24914613 0.92241294 -  
1.46668985  
C -3.06732560 0.67964730 -  
2.86656854  
C -2.74417247 1.80771590 -  
3.63805883  
C -1.75889827 1.73767721 -  
4.62866071  
C -1.08925022 0.53307045 -  
4.86113658  
C -1.41240902 -0.60205109 -  
4.10843523  
C -2.39634612 -0.53007467 -  
3.12128307  
H -2.62710301 -1.41993981 -  
2.53621504  
H -0.89312341 -1.54842298 -  
4.27919313  
H -0.31934614 0.47540458 -  
5.63562522  
H -1.51465147 2.62521325 -  
5.21819651  
H -3.26306288 2.75340398 -  
3.45582676  
C -5.14263926 -0.69865012 -  
1.39329473  
C -5.53189225 -1.37584400 -  
2.56263766  
C -6.37094108 -2.49232113 -  
2.49665768  
C -6.84164607 -2.94920412 -  
1.26167053  
C -6.47353767 -2.27444077 -  
0.09233752  
C -5.63954372 -1.15561481 -  
0.15889788  
H -5.37544873 -0.62589326  
0.75986588  
H -6.83860559 -2.62087567  
0.87811166

H -7.49222142 -3.82577963 -  
1.20990496  
H -6.65090807 -3.01293219 -  
3.41632356  
H -5.16857916 -1.03735300 -  
3.53590495  
H -3.27674743 -1.70627245  
0.69009687  
H -3.22096453 -2.43588527  
3.18895378  
H -1.91728098 -3.46027749  
5.05832720  
H 0.43713346 -4.18071945  
4.69274114  
H 1.50930085 -3.87088118  
2.45146417  
H 1.26745519 -3.00756306 -  
0.01020439  
H 0.60486635 -4.71745738 -  
1.87536560  
H -1.22864445 -5.77715547 -  
3.21135430  
H -3.60159682 -5.13963532 -  
2.79821916  
H -4.15688906 -3.42639743 -  
1.07379903  
61  
**Ligand 6 (PNP isomer)**  
C 2.51080279 2.30216630 -  
1.95023400  
C 1.22917598 2.01337438 -  
1.48132021  
C 0.88805364 0.71216530 -  
1.06547541  
C 1.86335638 -0.28974893 -  
1.15549212  
C 3.15905550 0.01685283 -  
1.57983795  
C 3.49491094 1.31006561 -  
1.98589031  
H 4.50820045 1.53414945 -  
2.32139651  
C 4.19785355 -1.07016290 -  
1.50522666  
F 5.32601612 -0.75449456 -  
2.16223889  
F 3.74731825 -2.23540331 -  
2.00532527  
F 4.54572630 -1.31547326 -  
0.21816711  
H 1.62072777 -1.31074633 -  
0.86792231  
N -0.40357535 0.43634461 -  
0.52243549  
P -0.61971745 -0.17243390  
1.13105467  
C 0.80203771 0.61002024  
2.02239330  
C 0.50785057 1.76261625  
2.77329543  
C 1.52089889 2.46700272  
3.43078183  
C 2.84439276 2.02329816  
3.35242587  
C 3.14741706 0.86682471  
2.62596747  
C 2.13491793 0.16225831  
1.97144141  
H 2.39423130 -0.74066258  
1.41958899

H 4.17821268 0.50995009  
2.55755373  
H 3.63879036 2.57419026  
3.86283220  
H 1.27442613 3.36112079  
4.00944319  
H -0.52665140 2.10961970  
2.84277711  
C -0.11677708 -1.94932985  
1.03462100  
C -0.38169093 -2.71558933 -  
0.11373014  
C -0.14327017 -4.09191408 -  
0.12378250  
C 0.35523219 -4.73026180  
1.01607942  
C 0.60876202 -3.98071338  
2.16899519  
C 0.37014167 -2.60365289  
2.18101815  
H 0.57639903 -2.03340589  
3.09063634  
H 0.99962586 -4.46903497  
3.06564842  
H 0.54587241 -5.80637437  
1.00631727  
H -0.34914430 -4.66651176 -  
1.03058583  
H -0.77044192 -2.23195966 -  
1.01056998  
P -1.78620929 0.92716862 -  
1.50026746  
C -2.67677413 2.12233849 -  
0.40983816  
C -1.95577106 2.99460445  
0.42461046  
C -2.60911653 3.99412697  
1.14995560  
C -3.99540067 4.14651742  
1.04782079  
C -4.72156115 3.29434545  
0.20986365  
C -4.06882218 2.29380564 -  
0.51574183  
H -4.65314557 1.63351771 -  
1.16191611  
H -5.80561360 3.40538365  
0.12211049  
H -4.50758668 4.92601145  
1.61747356  
H -2.02997071 4.65519800  
1.80040736  
H -0.87372895 2.88534018  
0.52070863  
C -2.86972143 -0.57192414 -  
1.42756162  
C -3.61825922 -0.97114318 -  
0.30543142  
C -4.31245968 -2.18293790 -  
0.31445704  
C -4.27553870 -3.00873474 -  
1.44367649  
C -3.55073381 -2.61390009 -  
2.57172400  
C -2.85594030 -1.40046184 -  
2.56346075  
H -2.28503135 -1.09458419 -  
3.44508484  
H -3.52657541 -3.25008294 -  
3.46025243

|                              |                                        |                       |
|------------------------------|----------------------------------------|-----------------------|
| H -4.81586018 -3.95896216 -  | C -4.57158461 -2.74665312              | P -3.04008 10.31846 - |
| 1.44445312                   | 0.11898312                             | 6.50322               |
| H -4.88015888 -2.48832298    | C -3.30619434 -2.28969897 -            | P -4.15004 10.07846 - |
| 0.56825792                   | 0.25535802                             | 4.02498               |
| H -3.64557889 -0.33745479    | H -2.92642576 -2.50895661 -            | N -3.83994 9.17740 -  |
| 0.58270074                   | 1.25621727                             | 5.47257               |
| H 0.48115920 2.80662519 -    | H -5.17532561 -3.31650374 -            | C -3.88947 7.74275 -  |
| 1.42447835                   | 0.59164615                             | 5.55327               |
| H 2.75177550 3.31914858 -    | H -6.05350474 -2.83448045              | C -1.65760 13.88208 - |
| 2.26885898                   | 1.69226109                             | 6.35836               |
| 61                           | H -4.66688185 -1.54231943              | C -3.12785 13.50017 - |
| <b>Ligand 6 (PPN isomer)</b> | 3.31217982                             | 6.51738               |
| C 2.33659589 1.73514358      | H -2.39530590 -0.72110030              | C -3.69727 13.11921 - |
| 3.16758249                   | 2.63290131                             | 3.15313               |
| C 1.11982590 1.14001999      | P -1.43680497 0.45573516 -             | C -1.12627 13.65954 - |
| 2.83732842                   | 1.60786392                             | 4.91990               |
| C 0.98424450 0.31540769      | C -2.64754303 1.55434423 -             | C -1.69682 14.59441 - |
| 1.69412009                   | 0.74774944                             | 3.82474               |
| C 2.14494408 0.11379463      | C -2.52861960 2.02750671               | C -2.42317 13.84107 - |
| 0.90618363                   | 0.57435589                             | 2.69816               |
| C 3.35785051 0.70677547      | C -3.52879295 2.83004102               | H -10.33582 8.26860 - |
| 1.25117885                   | 1.12810222                             | 5.07132               |
| C 3.47221035 1.52712973      | C -4.65817039 3.17369735               | C -9.53441 7.61444 -  |
| 2.38153009                   | 0.37774693                             | 5.41615               |
| H 4.42768242 1.98876937      | C -4.78911525 2.70601107 -             | C -9.66895 6.22772 -  |
| 2.63703234                   | 0.93247957                             | 5.30464               |
| C 4.58943306 0.46334621      | C -3.79289138 1.89829293 -             | C -8.64402 5.37308 -  |
| 0.41980298                   | 1.48840008                             | 5.74017               |
| F 5.56194019 -0.13751969     | H -3.90535040 1.52673169 -             | C -7.49025 5.93017 -  |
| 1.13652757                   | 2.51071644                             | 6.28256               |
| F 4.35585325 -0.31599881 -   | H -5.67073054 2.96599173 -             | C -7.35611 7.32278 -  |
| 0.65386380                   | 1.52395676                             | 6.39158               |
| F 5.12269006 1.61839738 -    | H -5.43764825 3.80234542               | C -8.36953 8.17183 -  |
| 0.04117952                   | 0.81616141                             | 5.95857               |
| H 2.09508940 -0.49791183     | H -3.42525231 3.18591347               | H -10.58258 5.80293 - |
| 0.00783170                   | 2.15650241                             | 4.88378               |
| N -0.25017398 -0.25096331    | H -1.66432366 1.74860276               | H -8.75583 4.29019 -  |
| 1.45144562                   | 1.17917561                             | 5.66163               |
| P -0.90525034 -0.89648025    | C 0.16226566 1.38052516 -              | C -6.03972 7.74169 -  |
| 0.15611694                   | 1.64815111                             | 7.03252               |
| C 0.02519123 -2.29583909 -   | C 0.41369185 2.58242933 -              | H -8.25255 9.25482 -  |
| 0.59352173                   | 0.96725793                             | 6.03254               |
| C -0.09475655 -2.68338298 -  | C 1.67630318 3.17631901 -              | C -6.29632 5.17573 -  |
| 1.93782942                   | 1.02973694                             | 6.85902               |
| C 0.64562991 -3.76572305 -   | C 2.70257747 2.58223925 -              | C -4.94103 7.09413 -  |
| 2.42309487                   | 1.76877943                             | 6.20585               |
| C 1.50916161 -4.46313749 -   | C 2.45586490 1.39671638 -              | C -5.06656 5.69706 -  |
| 1.57303425                   | 2.46705296                             | 6.12692               |
| C 1.63157086 -4.07984465 -   | C 1.19294459 0.80553747 -              | C -4.12120 4.92966 -  |
| 0.23301870                   | 2.41636182                             | 5.43269               |
| C 0.89340823 -3.00101607     | H 1.01268402 -0.12420709 -             | C -3.04683 5.59115 -  |
| 0.25708961                   | 2.96286180                             | 4.80800               |
| H 0.99533516 -2.68904087     | H 3.25564372 0.92131302 -              | C -2.92862 6.97522 -  |
| 1.29924148                   | 3.03884904                             | 4.86883               |
| H 2.30997810 -4.61937205     | H 3.69751676 3.03035122 -              | H -2.10087 7.47325 -  |
| 0.43239279                   | 1.78662291                             | 4.36616               |
| H 2.09190547 -5.30453170 -   | H 1.86373780 4.10153081 -              | H -5.70488 7.30094 -  |
| 1.95638559                   | 0.47933483                             | 11.76990              |
| H 0.55032417 -4.06093002 -   | H -0.36947351 3.05496694 -             | C -5.83782 6.83907 -  |
| 3.47104702                   | 0.37397468                             | 10.78995              |
| H -0.75886667 -2.13708147 -  | H 0.23597697 1.29892606                | C -6.04578 5.46188 -  |
| 2.61171839                   | 3.45936667                             | 10.69130              |
| C -2.52776426 -1.55945318    | H 2.40068131 2.37076933                | C -6.20320 4.85907 -  |
| 0.65619131                   | 4.05497414                             | 9.43484               |
| C -3.01903884 -1.28988446    | 145                                    | C -6.16153 5.65529 -  |
| 1.94100944                   | <b>1-chromacycloheptane (cationic,</b> | 8.29649               |
| C -4.28504345 -1.75166545    | <b>quartet)</b>                        | C -5.99003 7.04468 -  |
| 2.30968826                   | Cr -3.42938 12.22645 -                 | 8.39428               |
| C -5.06254146 -2.47672390    | 4.96529                                | C -5.81129 7.64156 -  |
| 1.40106179                   |                                        | 9.63967               |

|          |          |         |   |         |          |          |   |          |          |          |   |
|----------|----------|---------|---|---------|----------|----------|---|----------|----------|----------|---|
| H        | -6.07148 | 4.84706 | - | H       | -7.51451 | 0.88161  | - | H        | -8.71164 | 11.01184 | - |
| 11.59246 |          |         |   | 8.43676 |          |          |   | 2.39558  |          |          |   |
| H        | -6.33788 | 3.77993 | - | H       | -5.66635 | 1.98312  | - | H        | -6.48501 | 11.62851 | - |
| 9.34965  |          |         |   | 7.22485 |          |          |   | 3.30825  |          |          |   |
| H        | -5.67253 | 8.71728 | - | H       | -9.57662 | 0.18202  | - | H        | -9.29045 | 8.62142  | - |
| 9.73010  |          |         |   | 7.21903 |          |          |   | 2.02616  |          |          |   |
| H        | -5.93458 | 8.82436 | - | H       | -9.76641 | 0.61340  | - | H        | -7.63044 | 6.83514  | - |
| 7.10636  |          |         |   | 4.76468 |          |          |   | 2.56607  |          |          |   |
| H        | -6.41140 | 4.09404 | - | C       | -4.61378 | 1.54901  | - | C        | -3.93565 | 10.53103 | - |
| 6.79238  |          |         |   | 3.38355 |          |          |   | 8.07545  |          |          |   |
| C        | -1.44945 | 2.88257 | - | C       | -4.53823 | 0.22330  | - | C        | -3.28570 | 10.48474 | - |
| 5.67448  |          |         |   | 3.84116 |          |          |   | 9.31932  |          |          |   |
| C        | -1.17473 | 2.43859 | - | C       | -3.85535 | -0.74128 | - | C        | -3.96121 | 10.88147 | - |
| 4.36651  |          |         |   | 3.09516 |          |          |   | 10.47791 |          |          |   |
| C        | 0.08046  | 2.63980 | - | C       | -3.24762 | -0.39233 | - | C        | -5.28295 | 11.33001 | - |
| 3.79075  |          |         |   | 1.88389 |          |          |   | 10.40604 |          |          |   |
| C        | 1.09549  | 3.26918 | - | C       | -3.33259 | 0.92124  | - | C        | -5.93480 | 11.38381 | - |
| 4.52173  |          |         |   | 1.41096 |          |          |   | 9.16628  |          |          |   |
| C        | 0.84392  | 3.68658 | - | C       | -4.01796 | 1.88675  | - | C        | -5.26103 | 11.00190 | - |
| 5.83100  |          |         |   | 2.15528 |          |          |   | 8.00810  |          |          |   |
| C        | -0.41712 | 3.49307 | - | H       | -5.01324 | -0.05345 | - | H        | -2.25015 | 10.15067 | - |
| 6.40542  |          |         |   | 4.78373 |          |          |   | 9.38934  |          |          |   |
| H        | -1.95004 | 1.93241 | - | H       | -2.87299 | 1.19013  | - | H        | -6.96547 | 11.73489 | - |
| 3.79182  |          |         |   | 0.45783 |          |          |   | 9.10277  |          |          |   |
| H        | 1.63306  | 4.16237 | - | H       | -4.09289 | 2.91107  | - | H        | -5.76504 | 11.08058 | - |
| 6.41576  |          |         |   | 1.78458 |          |          |   | 7.04186  |          |          |   |
| H        | -0.59023 | 3.82083 | - | H       | -2.72152 | -1.15019 | - | H        | -5.80459 | 11.64045 | - |
| 7.42977  |          |         |   | 1.30058 |          |          |   | 11.31245 |          |          |   |
| H        | 2.08192  | 3.41544 | - | H       | -3.79687 | -1.76686 | - | H        | -3.44943 | 10.84351 | - |
| 4.07942  |          |         |   | 3.46167 |          |          |   | 11.44042 |          |          |   |
| H        | 0.26978  | 2.28998 | - | P       | -5.45227 | 2.91337  | - | C        | -1.46522 | 9.51501  | - |
| 2.77492  |          |         |   | 4.29377 |          |          |   | 6.91925  |          |          |   |
| C        | -3.08189 | 3.27066 | - | N       | -4.21757 | 3.49974  | - | C        | -0.26628 | 10.04625 | - |
| 8.01170  |          |         |   | 5.39063 |          |          |   | 6.42382  |          |          |   |
| C        | -2.80169 | 4.62390 | - | C       | -2.97555 | 9.53000  | - | C        | 0.93505  | 9.35633  | - |
| 8.29347  |          |         |   | 2.72542 |          |          |   | 6.60445  |          |          |   |
| C        | -2.74274 | 5.07616 | - | C       | -3.35968 | 8.86614  | - | C        | 0.94407  | 8.13213  | - |
| 9.61079  |          |         |   | 1.55090 |          |          |   | 7.27811  |          |          |   |
| C        | -2.94665 | 4.19061 | - | C       | -2.39644 | 8.50695  | - | C        | -0.24699 | 7.59846  | - |
| 10.67378 |          |         |   | 0.60395 |          |          |   | 7.78037  |          |          |   |
| C        | -3.22402 | 2.84635 | - | C       | -1.04894 | 8.81112  | - | C        | -1.44897 | 8.28553  | - |
| 10.41306 |          |         |   | 0.81377 |          |          |   | 7.60597  |          |          |   |
| C        | -3.29800 | 2.39543 | - | C       | -0.66066 | 9.49288  | - | H        | -0.26332 | 11.00033 | - |
| 9.09143  |          |         |   | 1.97231 |          |          |   | 5.89663  |          |          |   |
| H        | -2.61993 | 5.32562 | - | C       | -1.61890 | 9.85279  | - | H        | -0.24210 | 6.64454  | - |
| 7.48212  |          |         |   | 2.91595 |          |          |   | 8.30858  |          |          |   |
| H        | -3.38226 | 2.14804 | - | H       | -4.40620 | 8.62069  | - | H        | -2.37512 | 7.86153  | - |
| 11.23609 |          |         |   | 1.37126 |          |          |   | 7.99800  |          |          |   |
| H        | -3.51142 | 1.34221 | - | H       | 0.38691  | 9.74643  | - | H        | 1.88205  | 7.59426  | - |
| 8.89363  |          |         |   | 2.14001 |          |          |   | 7.41767  |          |          |   |
| H        | -2.90376 | 4.55288 | - | H       | -1.30458 | 10.37864 | - | H        | 1.86354  | 9.77981  | - |
| 11.70140 |          |         |   | 3.81788 |          |          |   | 6.21817  |          |          |   |
| H        | -2.55582 | 6.13174 | - | H       | -0.30137 | 8.52709  | - | H        | -2.30245 | 5.00456  | - |
| 9.81589  |          |         |   | 0.07179 |          |          |   | 4.27242  |          |          |   |
| P        | -3.12971 | 2.47806 | - | H       | -2.70179 | 7.98531  | - | H        | -1.05973 | 13.27616 | - |
| 6.34010  |          |         |   | 0.30305 |          |          |   | 7.05654  |          |          |   |
| C        | -6.66534 | 1.95826 | - | C       | -5.79319 | 9.57763  | - | H        | -1.47815 | 14.93848 | - |
| 5.30505  |          |         |   | 3.43243 |          |          |   | 6.63142  |          |          |   |
| C        | -7.83682 | 1.56618 | - | C       | -6.12170 | 8.22349  | - | H        | -3.42941 | 13.30299 | - |
| 4.62850  |          |         |   | 3.20949 |          |          |   | 7.55228  |          |          |   |
| C        | -8.87068 | 0.91798 | - | C       | -7.37895 | 7.88598  | - | H        | -3.82661 | 14.25273 | - |
| 5.30749  |          |         |   | 2.71280 |          |          |   | 6.08566  |          |          |   |
| C        | -8.76462 | 0.67412 | - | C       | -8.30870 | 8.88793  | - | H        | -4.45627 | 13.83649 | - |
| 6.68188  |          |         |   | 2.41676 |          |          |   | 3.54877  |          |          |   |
| C        | -7.60921 | 1.06709 | - | C       | -7.98849 | 10.23167 | - | H        | -4.16915 | 12.57264 | - |
| 7.36523  |          |         |   | 2.63371 |          |          |   | 2.32616  |          |          |   |
| C        | -6.56438 | 1.69447 | - | C       | -6.73550 | 10.57868 | - | H        | -1.29549 | 12.59745 | - |
| 6.67918  |          |         |   | 3.14638 |          |          |   | 4.60919  |          |          |   |
| H        | -7.94263 | 1.77723 | - | H       | -5.40723 | 7.43036  | - | H        | -0.02780 | 13.71724 | - |
| 3.56105  |          |         |   | 3.42566 |          |          |   | 4.93581  |          |          |   |

|                                                 |          |          |   |         |          |          |   |                                                 |          |          |   |
|-------------------------------------------------|----------|----------|---|---------|----------|----------|---|-------------------------------------------------|----------|----------|---|
| H                                               | -0.88178 | 15.19607 | - | H       | 5.75491  | 5.06908  | - | H                                               | 2.17396  | 0.77833  |   |
| 3.39832                                         |          |          |   | 2.11269 |          |          |   | 1.81119                                         |          |          |   |
| H                                               | -2.39563 | 15.31670 | - | C       | -0.30614 | 4.46442  | - | F                                               | -3.14718 | 0.93606  | - |
| 4.27873                                         |          |          |   | 2.90356 |          |          |   | 0.43950                                         |          |          |   |
| H                                               | -1.73773 | 13.10237 | - | C       | -1.68807 | 4.52163  | - | F                                               | -2.68231 | -0.29784 |   |
| 2.24691                                         |          |          |   | 2.65140 |          |          |   | 1.31401                                         |          |          |   |
| H                                               | -2.67322 | 14.55456 | - | C       | -2.60118 | 4.15090  | - | F                                               | -1.87390 | -0.83788 | - |
| 1.89070                                         |          |          |   | 3.63712 |          |          |   | 0.64948                                         |          |          |   |
| 80                                              |          |          |   | C       | -2.14740 | 3.74410  | - | H                                               | -0.66289 | 7.75708  | - |
| <b>6-chromacycloheptane (cationic, quartet)</b> |          |          |   | 4.89627 |          |          |   | 3.40553                                         |          |          |   |
| Cr                                              | 0.82567  | 7.49388  | - | C       | -0.77426 | 3.70451  | - | H                                               | -1.43117 | 9.27017  | - |
| 0.78442                                         |          |          |   | 5.16165 |          |          |   | 2.91036                                         |          |          |   |
| P                                               | 0.38676  | 5.91859  |   | C       | 0.14532  | 4.06485  | - | H                                               | -1.78416 | 7.01110  | - |
| 0.94116                                         |          |          |   | 4.17503 |          |          |   | 1.40507                                         |          |          |   |
| P                                               | 0.85656  | 5.10956  | - | H       | -2.05220 | 4.85336  | - | H                                               | -1.48475 | 8.54976  | - |
| 1.66195                                         |          |          |   | 1.67979 |          |          |   | 0.52938                                         |          |          |   |
| N                                               | 0.28959  | 4.54201  | - | H       | -0.41485 | 3.38776  | - | H                                               | 0.35660  | 9.31274  |   |
| 0.10256                                         |          |          |   | 6.14127 |          |          |   | 1.02924                                         |          |          |   |
| C                                               | 0.25162  | 3.16091  |   | H       | 1.21306  | 4.02559  | - | H                                               | 2.04689  | 8.77902  |   |
| 0.31158                                         |          |          |   | 4.39525 |          |          |   | 1.17654                                         |          |          |   |
| C                                               | -0.69045 | 8.51005  | - | H       | -2.86195 | 3.45758  | - | H                                               | 1.55537  | 8.54158  | - |
| 2.60279                                         |          |          |   | 5.66764 |          |          |   | 2.35653                                         |          |          |   |
| C                                               | -1.09361 | 7.85419  | - | H       | -3.66991 | 4.18278  | - | H                                               | 0.93221  | 9.51175  | - |
| 1.28629                                         |          |          |   | 3.42119 |          |          |   | 3.60102                                         |          |          |   |
| C                                               | 1.26474  | 9.06756  |   | C       | 1.62306  | 5.56390  |   | H                                               | 1.15691  | 11.34044 | - |
| 0.45030                                         |          |          |   | 2.22572 |          |          |   | 2.21856                                         |          |          |   |
| C                                               | 0.68803  | 9.24333  | - | C       | 2.97355  | 5.79962  |   | H                                               | -0.22018 | 10.75013 | - |
| 2.56305                                         |          |          |   | 1.91493 |          |          |   | 1.29049                                         |          |          |   |
| C                                               | 0.79131  | 10.48179 | - | C       | 3.97349  | 5.42089  |   | H                                               | 2.73752  | 10.08831 | - |
| 1.63651                                         |          |          |   | 2.81088 |          |          |   | 0.78525                                         |          |          |   |
| C                                               | 1.70735  | 10.25538 | - | C       | 3.62943  | 4.81646  |   | H                                               | 1.75011  | 11.18315 |   |
| 0.42291                                         |          |          |   | 4.02549 |          |          |   | 0.17582                                         |          |          |   |
| C                                               | 0.16727  | 0.46742  |   | C       | 2.28619  | 4.59173  |   | 76                                              |          |          |   |
| 1.08409                                         |          |          |   | 4.34392 |          |          |   | <b>7-chromacycloheptane (cationic, quartet)</b> |          |          |   |
| C                                               | 1.31022  | 1.22980  |   | C       | 1.28110  | 4.96302  |   | Cr                                              | 3.09930  | -1.72100 |   |
| 1.32354                                         |          |          |   | 3.44862 |          |          |   | 3.36810                                         |          |          |   |
| C                                               | 1.36114  | 2.56885  |   | H       | 3.24987  | 6.26267  |   | P                                               | 4.72680  | -0.47691 |   |
| 0.93179                                         |          |          |   | 0.96594 |          |          |   | 2.12300                                         |          |          |   |
| C                                               | -0.89185 | 2.39586  |   | H       | 2.01793  | 4.12490  |   | P                                               | 4.53940  | -3.17520 |   |
| 0.05646                                         |          |          |   | 5.29189 |          |          |   | 1.98680                                         |          |          |   |
| C                                               | -0.92910 | 1.05524  |   | H       | 0.23563  | 4.77450  |   | N                                               | 5.50330  | -1.85250 |   |
| 0.44065                                         |          |          |   | 3.69388 |          |          |   | 1.42470                                         |          |          |   |
| H                                               | 2.26379  | 3.15339  |   | H       | 4.41013  | 4.52240  |   | C                                               | 6.75530  | -1.76670 |   |
| 1.09758                                         |          |          |   | 4.72815 |          |          |   | 0.58970                                         |          |          |   |
| H                                               | -1.74382 | 2.83759  | - | H       | 5.02029  | 5.60211  |   | C                                               | 0.35230  | -2.31210 |   |
| 0.45130                                         |          |          |   | 2.56527 |          |          |   | 2.68300                                         |          |          |   |
| C                                               | -2.15777 | 0.22104  |   | C       | -1.19706 | 6.13761  |   | C                                               | 0.25810  | -2.49250 |   |
| 0.16503                                         |          |          |   | 1.79548 |          |          |   | 4.21110                                         |          |          |   |
| C                                               | 2.43605  | 4.26280  | - | C       | -1.26669 | 7.13085  |   | C                                               | 1.56960  | -3.01770 |   |
| 1.97257                                         |          |          |   | 2.78965 |          |          |   | 4.84710                                         |          |          |   |
| C                                               | 3.60109  | 5.04610  | - | C       | -2.48850 | 7.42043  |   | C                                               | 1.44361  | -1.33050 |   |
| 1.95549                                         |          |          |   | 3.39831 |          |          |   | 2.25280                                         |          |          |   |
| C                                               | 4.85617  | 4.45185  | - | C       | -3.64557 | 6.73138  |   | C                                               | 2.78170  | -0.73320 |   |
| 2.11576                                         |          |          |   | 3.01502 |          |          |   | 5.10330                                         |          |          |   |
| C                                               | 4.95127  | 3.06842  | - | C       | -3.57944 | 5.75373  |   | C                                               | 2.32120  | -2.03010 |   |
| 2.28613                                         |          |          |   | 2.01866 |          |          |   | 5.79530                                         |          |          |   |
| C                                               | 3.79510  | 2.28056  | - | C       | -2.35962 | 5.46054  |   | C                                               | 6.69630  | -2.67200 | - |
| 2.30590                                         |          |          |   | 1.40270 |          |          |   | 0.64100                                         |          |          |   |
| C                                               | 2.53797  | 2.87077  | - | H       | -0.37000 | 7.67523  |   | C                                               | 8.03760  | -1.99300 |   |
| 2.15280                                         |          |          |   | 3.09157 |          |          |   | 1.39350                                         |          |          |   |
| H                                               | 3.52953  | 6.12939  | - | H       | -4.47768 | 5.21250  |   | C                                               | 6.74190  | 1.51630  |   |
| 1.83101                                         |          |          |   | 1.71898 |          |          |   | 2.25950                                         |          |          |   |
| H                                               | 3.86971  | 1.20050  | - | H       | -2.31373 | 4.70057  |   | C                                               | 7.79070  | 2.17260  |   |
| 2.44228                                         |          |          |   | 0.62651 |          |          |   | 2.90930                                         |          |          |   |
| H                                               | 1.64325  | 2.24752  | - | H       | -4.59856 | 6.95921  |   | C                                               | 8.12470  | 1.83630  |   |
| 2.18053                                         |          |          |   | 3.49323 |          |          |   | 4.22640                                         |          |          |   |
| H                                               | 5.92970  | 2.60133  | - | H       | -2.53912 | 8.18568  |   | C                                               | 7.40020  | 0.84950  |   |
| 2.41084                                         |          |          |   | 4.17244 |          |          |   | 4.90400                                         |          |          |   |
|                                                 |          |          |   | H       | 0.12839  | -0.57838 |   |                                                 |          |          |   |
|                                                 |          |          |   | 1.39252 |          |          |   |                                                 |          |          |   |

|         |          |          |   |          |           |           |   |          |           |           |   |
|---------|----------|----------|---|----------|-----------|-----------|---|----------|-----------|-----------|---|
| C       | 6.34670  | 0.19590  |   | H        | 5.76800   | -2.53790  | - | C        | -8.495000 | -0.362500 | - |
| 4.26220 |          |          |   | 1.21220  |           |           |   | 0.642400 |           |           |   |
| C       | 6.02110  | 0.51480  |   | H        | 8.90550   | -1.78990  |   | C        | -7.944200 | 0.850600  | - |
| 2.93180 |          |          |   | 0.75110  |           |           |   | 1.404500 |           |           |   |
| C       | 3.88220  | 0.02740  | - | H        | 8.10190   | -1.31900  |   | H        | -6.338500 | -2.799300 |   |
| 0.51500 |          |          |   | 2.25690  |           |           |   | 0.789300 |           |           |   |
| C       | 3.24890  | 0.79651  | - | H        | 8.11820   | -3.03260  |   | H        | -7.802300 | -2.097300 |   |
| 1.49450 |          |          |   | 1.74060  |           |           |   | 1.491000 |           |           |   |
| C       | 2.78100  | 2.07630  | - | H        | 7.64610   | 0.59670   |   | H        | -5.338400 | -1.127500 |   |
| 1.18660 |          |          |   | 5.93600  |           |           |   | 2.201000 |           |           |   |
| C       | 2.94470  | 2.59280  |   | H        | 8.94450   | 2.35200   |   | H        | -6.663000 | 0.061500  |   |
| 0.10360 |          |          |   | 4.72900  |           |           |   | 1.904400 |           |           |   |
| C       | 3.57970  | 1.83270  |   | H        | 6.48410   | 1.78830   |   | H        | -6.833400 | 1.986000  |   |
| 1.08630 |          |          |   | 1.23540  |           |           |   | 0.119500 |           |           |   |
| C       | 4.06000  | 0.54890  |   | H        | 8.34580   | 2.95380   |   | H        | -6.127000 | 2.083000  | - |
| 0.77560 |          |          |   | 2.38930  |           |           |   | 1.508900 |           |           |   |
| C       | 3.11230  | -3.97330 | - | H        | 5.76940   | -0.55730  |   | H        | -6.674400 | -1.388800 | - |
| 0.20760 |          |          |   | 4.79920  |           |           |   | 1.332900 |           |           |   |
| C       | 2.76600  | -4.78880 | - | H        | 2.57500   | 3.58930   |   | H        | -7.934200 | -2.462600 | - |
| 1.28610 |          |          |   | 0.34860  |           |           |   | 0.950800 |           |           |   |
| C       | 3.47350  | -5.97230 | - | H        | 2.28150   | 2.67220   | - | H        | -9.422200 | -0.710300 | - |
| 1.51920 |          |          |   | 1.94970  |           |           |   | 1.120200 |           |           |   |
| C       | 4.52470  | -6.34060 | - | H        | 4.22450   | -0.97910  | - | H        | -8.773300 | -0.058700 |   |
| 0.67250 |          |          |   | 0.75640  |           |           |   | 0.380100 |           |           |   |
| C       | 4.88400  | -5.52270 |   | H        | 3.11900   | 0.39010   | - | H        | -7.765700 | 0.555000  | - |
| 0.40080 |          |          |   | 2.49800  |           |           |   | 2.453200 |           |           |   |
| C       | 4.18130  | -4.32970 |   | H        | 3.69500   | 2.23850   |   | H        | -8.721000 | 1.635800  | - |
| 0.63230 |          |          |   | 2.09320  |           |           |   | 1.444300 |           |           |   |
| C       | 4.81880  | -5.28680 |   | H        | 5.07030   | -7.26900  | - | C        | -0.230400 | 0.069800  |   |
| 3.79050 |          |          |   | 0.84821  |           |           |   | 1.239100 |           |           |   |
| C       | 5.30020  | -5.88220 |   | H        | 3.19750   | -6.61400  | - | C        | 1.122200  | 0.403800  |   |
| 4.95680 |          |          |   | 2.35660  |           |           |   | 1.253400 |           |           |   |
| C       | 6.35110  | -5.29290 |   | H        | 2.55280   | -3.05540  | - | C        | 1.817800  | 0.643000  |   |
| 5.67050 |          |          |   | 0.01740  |           |           |   | 0.058000 |           |           |   |
| C       | 6.91510  | -4.09900 |   | H        | 1.93820   | -4.50380  | - | C        | 1.157300  | 0.428600  | - |
| 5.21240 |          |          |   | 1.93590  |           |           |   | 1.161300 |           |           |   |
| C       | 6.43620  | -3.49690 |   | H        | 5.71290   | -5.81080  |   | C        | -0.196800 | 0.106200  | - |
| 4.04710 |          |          |   | 1.04820  |           |           |   | 1.180100 |           |           |   |
| C       | 5.39730  | -4.09280 |   | H        | 7.73230   | -3.62950  |   | H        | -0.711100 | -0.005900 | - |
| 3.31240 |          |          |   | 5.76150  |           |           |   | 2.132400 |           |           |   |
| H       | -0.62950 | -1.97090 |   | H        | 6.72930   | -5.76320  |   | C        | 4.543800  | 0.521800  | - |
| 2.30630 |          |          |   | 6.57830  |           |           |   | 2.382400 |           |           |   |
| H       | 0.53160  | -3.29390 |   | H        | 3.99010   | -5.75350  |   | C        | 3.850000  | 1.556100  | - |
| 2.21260 |          |          |   | 3.25380  |           |           |   | 3.029600 |           |           |   |
| H       | -0.00750 | -1.52890 |   | H        | 4.85320   | -6.81130  |   | C        | 4.075700  | 1.835600  | - |
| 4.67460 |          |          |   | 5.31030  |           |           |   | 4.380400 |           |           |   |
| H       | -0.56510 | -3.18140 |   | H        | 6.88020   | -2.56500  |   | C        | 4.983100  | 1.069400  | - |
| 4.44860 |          |          |   | 3.70740  |           |           |   | 5.116200 |           |           |   |
| H       | 1.39510  | -3.94310 |   | 123      |           |           |   | C        | 5.687800  | 0.038200  | - |
| 5.41570 |          |          |   |          |           |           |   | 4.481300 |           |           |   |
| H       | 2.22870  | -3.43710 |   |          |           |           |   | C        | 5.483100  | -0.221700 | - |
| 4.03050 |          |          |   |          |           |           |   | 3.124500 |           |           |   |
| H       | 1.63980  | -1.36230 |   | Cr       | -5.398800 | -0.149300 | - | H        | 3.152900  | 2.176100  | - |
| 1.17110 |          |          |   | 0.321300 |           |           |   | 2.469700 |           |           |   |
| H       | 1.19980  | -0.28990 |   | P        | -3.291600 | -1.599700 | - | H        | 6.405900  | -0.559500 | - |
| 2.52790 |          |          |   | 0.268500 |           |           |   | 5.045500 |           |           |   |
| H       | 1.97810  | 0.01120  |   | P        | -3.431700 | 1.168500  |   | H        | 6.060300  | -1.010100 | - |
| 4.99870 |          |          |   | 0.067900 |           |           |   | 2.636600 |           |           |   |
| H       | 3.63980  | -0.25800 |   | N        | -2.341700 | -0.169300 | - | H        | 5.160800  | 1.289300  | - |
| 5.59830 |          |          |   | 0.012800 |           |           |   | 6.170100 |           |           |   |
| H       | 1.64240  | -1.82530 |   | C        | -0.909000 | -0.032900 |   | H        | 3.543700  | 2.663900  | - |
| 6.64200 |          |          |   | 0.017400 |           |           |   | 4.853500 |           |           |   |
| H       | 3.19080  | -2.55980 |   | C        | -6.926000 | -1.870500 |   | C        | 3.841000  | -1.472600 | - |
| 6.22060 |          |          |   | 0.857400 |           |           |   | 0.408000 |           |           |   |
| H       | 6.75570  | -0.72370 |   | C        | -6.074700 | -0.762900 |   | C        | 3.332200  | -2.234200 | - |
| 0.23541 |          |          |   | 1.473100 |           |           |   | 1.469700 |           |           |   |
| H       | 7.54400  | -2.42970 | - | C        | -6.640700 | 1.407300  | - | C        | 2.837400  | -3.522600 | - |
| 1.29640 |          |          |   | 0.801800 |           |           |   | 1.245100 |           |           |   |
| H       | 6.77790  | -3.73180 | - | C        | -7.488700 | -1.536900 | - | C        | 2.811400  | -4.052100 | - |
| 0.36951 |          |          |   | 0.559100 |           |           |   | 0.047700 |           |           |   |

**5-chromacycloheptane (cationic, quartet)**



|          |           |           |          |           |           |   |          |           |           |   |
|----------|-----------|-----------|----------|-----------|-----------|---|----------|-----------|-----------|---|
| C        | 3.307300  | -3.297800 | C        | -2.670500 | 3.959500  | - | C        | -1.300100 | -2.952200 | - |
| 1.115600 |           |           | 3.534300 |           |           |   | 1.776500 |           |           |   |
| C        | 3.833500  | -2.025800 | C        | -2.697800 | 2.570800  | - | H        | -4.388800 | -1.985300 | - |
| 0.884400 |           |           | 3.701900 |           |           |   | 2.895100 |           |           |   |
| H        | 3.332600  | -1.823400 | C        | -2.894300 | 1.736600  | - | H        | 0.218400  | -3.869700 | - |
| 2.479800 |           |           | 2.602500 |           |           |   | 2.996800 |           |           |   |
| H        | 3.311000  | -3.711000 | H        | -3.195000 | 4.124300  | - | H        | -0.683100 | -2.974000 | - |
| 2.126500 |           |           | 0.172700 |           |           |   | 0.877500 |           |           |   |
| H        | 4.240800  | -1.452600 | H        | -2.566500 | 2.133600  | - | H        | -1.164800 | -3.839700 | - |
| 1.718100 |           |           | 4.692300 |           |           |   | 5.068900 |           |           |   |
| H        | 2.423900  | -5.055700 | H        | -2.917600 | 0.655300  | - | H        | -3.476900 | -2.907100 | - |
| 0.223900 |           |           | 2.749800 |           |           |   | 5.010900 |           |           |   |
| H        | 2.468800  | -4.116000 | H        | -2.511000 | 4.608800  | - | H        | 1.687500  | 0.567100  | - |
| 2.083100 |           |           | 4.395600 |           |           |   | 2.100900 |           |           |   |
| P        | 4.525000  | 0.234700  | H        | -2.836500 | 5.593600  | - | H        | -0.768800 | -0.072600 |   |
| 0.558400 |           |           | 2.123400 |           |           |   | 2.174900 |           |           |   |
| C        | 4.727200  | 2.598300  | C        | -3.060000 | 2.075300  |   | H        | 1.642400  | 0.527200  |   |
| 2.019800 |           |           | 1.597800 |           |           |   | 2.203000 |           |           |   |
| C        | 5.447500  | 3.768400  | C        | -1.830600 | 2.740700  |   |          |           |           |   |
| 2.326900 |           |           | 1.773300 |           |           |   |          |           |           |   |
| C        | 6.440200  | 3.756900  | C        | -1.526300 | 3.320600  |   |          |           |           |   |
| 3.307900 |           |           | 3.004600 |           |           |   |          |           |           |   |
| C        | 6.729000  | 2.580500  | C        | -2.443700 | 3.253400  |   |          |           |           |   |
| 4.006400 |           |           | 4.058400 |           |           |   |          |           |           |   |
| C        | 6.006000  | 1.417200  | C        | -3.672400 | 2.609900  |   |          |           |           |   |
| 3.722800 |           |           | 3.882400 |           |           |   |          |           |           |   |
| C        | 5.007000  | 1.430100  | C        | -3.979000 | 2.013200  |   |          |           |           |   |
| 2.747600 |           |           | 2.657800 |           |           |   |          |           |           |   |
| H        | 5.236500  | 4.698500  | H        | -1.106300 | 2.799000  |   |          |           |           |   |
| 1.795100 |           |           | 0.960200 |           |           |   |          |           |           |   |
| H        | 6.214700  | 0.494700  | H        | -4.393300 | 2.572700  |   |          |           |           |   |
| 4.268100 |           |           | 4.699700 |           |           |   |          |           |           |   |
| H        | 4.438000  | 0.520800  | H        | -4.933000 | 1.505300  |   |          |           |           |   |
| 2.549900 |           |           | 2.520800 |           |           |   |          |           |           |   |
| H        | 7.508300  | 2.573100  | H        | -2.203000 | 3.711800  |   |          |           |           |   |
| 4.770100 |           |           | 5.018000 |           |           |   |          |           |           |   |
| H        | 6.993600  | 4.674300  | H        | -0.568000 | 3.822000  |   |          |           |           |   |
| 3.519000 |           |           | 3.142300 |           |           |   |          |           |           |   |
| C        | 3.941600  | 3.759000  | C        | -2.947900 | -2.721400 |   |          |           |           |   |
| 0.486500 |           |           | 1.125400 |           |           |   |          |           |           |   |
| C        | 5.264400  | 3.736100  | C        | -2.971900 | -4.115000 |   |          |           |           |   |
| 0.960700 |           |           | 0.945600 |           |           |   |          |           |           |   |
| C        | 5.611900  | 4.451200  | C        | -2.859300 | -4.966900 |   |          |           |           |   |
| 2.109000 |           |           | 2.046500 |           |           |   |          |           |           |   |
| C        | 4.646000  | 5.196400  | C        | -2.723100 | -4.438000 |   |          |           |           |   |
| 2.794700 |           |           | 3.333700 |           |           |   |          |           |           |   |
| C        | 3.330200  | 5.234700  | C        | -2.710700 | -3.052200 |   |          |           |           |   |
| 2.324700 |           |           | 3.519000 |           |           |   |          |           |           |   |
| C        | 2.982000  | 4.521900  | C        | -2.829300 | -2.195300 |   |          |           |           |   |
| 1.172600 |           |           | 2.424000 |           |           |   |          |           |           |   |
| H        | 6.017900  | 3.135000  | H        | -3.072600 | -4.540000 | - |          |           |           |   |
| 0.450500 |           |           | 0.054100 |           |           |   |          |           |           |   |
| H        | 2.572800  | 5.812500  | H        | -2.608900 | -2.634300 |   |          |           |           |   |
| 2.856700 |           |           | 4.521200 |           |           |   |          |           |           |   |
| H        | 1.949100  | 4.535100  | H        | -2.826900 | -1.116300 |   |          |           |           |   |
| 0.813800 |           |           | 2.582300 |           |           |   |          |           |           |   |
| H        | 4.917100  | 5.741100  | H        | -2.632600 | -5.105100 |   |          |           |           |   |
| 3.700700 |           |           | 4.191500 |           |           |   |          |           |           |   |
| H        | 6.635600  | 4.402700  | H        | -2.870900 | -6.046300 |   |          |           |           |   |
| 2.485000 |           |           | 1.893800 |           |           |   |          |           |           |   |
| P        | 3.287900  | 2.711300  | C        | -2.598900 | -2.411000 | - |          |           |           |   |
| 0.884400 |           |           | 1.743600 |           |           |   |          |           |           |   |
| N        | 3.160800  | 1.132600  | C        | -3.376800 | -2.398400 | - |          |           |           |   |
| 0.113900 |           |           | 2.914500 |           |           |   |          |           |           |   |
| C        | -3.048800 | 2.287300  | C        | -2.864800 | -2.915200 | - |          |           |           |   |
| 1.316800 |           |           | 4.108800 |           |           |   |          |           |           |   |
| C        | -3.047000 | 3.681300  | C        | -1.570000 | -3.439400 | - |          |           |           |   |
| 1.157100 |           |           | 4.138500 |           |           |   |          |           |           |   |
| C        | -2.849100 | 4.512100  | C        | -0.791500 | -3.458600 | - |          |           |           |   |
| 2.261900 |           |           | 2.974400 |           |           |   |          |           |           |   |

## References:

1. S. Lin, J. C. Fromer, Y. Ghosh, B. Hanna, M. Elanany, W. Xu, *Sci. Rep.*, **2021**, *11*, 4534.
2. L. Falivene, Z. Cao, A. Petta, L. Serra, A. Poater, R. Oliva, V. Scarano, L. Cavallo, *Nat. Chem.*, **2019**, *11*, 872.
3. P. D. Bartlett, M. J. Ryan and S. G. Cohen, *J. Am. Chem. Soc.*, **1942**, *64*, 2649.
4. J. R. Weidman, S. Luo, J. M. Breier, P. Buckley, P. Gao and R. Guo, *Polymer*, **2017**, *126*, 314.
5. S. A. Sydlik, Z. Chen and T. M. Swager, *Macromolecules*, **2011**, *44*, 976–980.
6. H. Tan, Q. Chen and H. Liu, *ACS Appl. Mater. Interfaces*, **2018**, *10*, 38, 32717–32725.
